# Supplementary material for: Erg is a crucial regulator of endocardial-mesenchymal transformation during cardiac valve morphogenesis
Source: PubMed Central journal article supplement — Development. 2012 Nov 1;139(21):3973–85. doi: 10.1242/dev.081596 (PMC3472597; doi:10.1242/dev.081596), 2012-11-01
Supplement: supp_dev.081596_DEV081596.pdf [file supp_dev.081596_DEV081596.pdf]

**Table S1. Primers and antibodies used in the study**

| <b>Primers</b>                            |                                      |                                                                                            |
|-------------------------------------------|--------------------------------------|--------------------------------------------------------------------------------------------|
| <b>Forward (5'-3')</b>                    | <b>Reverse (5'-3')</b>               | <b>Locus/transcript/remarks</b>                                                            |
| <b>Targeting construct and genotyping</b> |                                      |                                                                                            |
| CGCGGCTTAATTAATTAGCTGAGCCAGAGCTTTTC       | TAAAGGTCTCAGCGGCTTCAGCAGGCCAGCTCACTC | Cloning 5' arm of homology for <i>Erg</i> <sup>ΔEx3</sup> targeting construct              |
| GGCCCGTCTCACTTCCTTGGAACTCTGTGTGGTGC       | GAATTCCTCGAGCATCCCACGGGAGACTGGGG     | Cloning 3' arm of homology for <i>Erg</i> <sup>ΔEx43</sup> targeting construct             |
| CATGCACACTTGTGCAGCAAGC                    | AGTGAGACCAGCTTAACTCCATGC             | 5' Southern probe for <i>Erg</i> <sup>ΔEx43</sup> targeting                                |
| CCAGGCATCCAGAATCAAGG                      | TTTTCTCCATACTGGGGCCA                 | 3' Southern probe for <i>Erg</i> <sup>ΔEx3</sup> targeting                                 |
| TTGTTCCACGGAGAATCCGA                      | TCATCGG TCAGACGATTCATTGGCA           | WT PCR genotyping for <i>Erg</i> <sup>ΔEx3</sup> mice                                      |
| ATGGCGCGCCTCAGTATCTGTTTTTCATTCT           | GCGTCTCAGCGCAAGTTTATTGATCGTTA        | Cloning 5' arm of homology for <i>Erg</i> <sup>ΔEx4</sup> targeting construct              |
| ACGTCTCTTCTTGTGCAGGTTGGAGAAGC             | CCCCTCGAGTTGAGACATGAACTCGCCAT        | Cloning 3' arm of homology for <i>Erg</i> <sup>ΔEx4</sup> targeting construct              |
| TTGCCCAGCAGGATAAAAC                       | ACACCTGCAAGACCTGGAAC                 | 5' Southern probe for <i>Erg</i> <sup>ΔEx4</sup> targeting                                 |
| CTGGGAGGTCTGTGTGTTT                       | AGAGGGAGGAAGGAAAAGCAG                | 3' Southern probe for <i>Erg</i> <sup>ΔEx4</sup> targeting                                 |
| ATGATGGCCATTAAGGCTTG                      | GCATAGGTGCTTGTGCATTC                 | WT PCR genotyping for <i>Erg</i> <sup>ΔEx4</sup> mice                                      |
| TTGTTCCACGGAGAATCCGA                      | TCATCGGTCAGACGATTCATTGGCA            | Targeted PCR genotyping for <i>Erg</i> <sup>ΔEx3</sup> and <i>Erg</i> <sup>ΔEx4</sup> mice |
| <b>RT-PCR</b>                             |                                      |                                                                                            |
| TGAAGGCCATGATCCAGACTGT                    | TCACTGGAAGAGGATGCGGTCAT              | <i>Erg</i> isoform 1-4                                                                     |
| CTTGATTGCATTATGGCCAGCACTA                 | TAGCCAGGTGTGGCGTTCCCGTA              | <i>Erg</i> isoforms 5-7                                                                    |
| GCTAGAGCGGCTTCTGAGAAA                     | TCCACCACAGGGTCTACCAC                 | <i>ErbB2</i>                                                                               |
| GTGCTATGGACCCTACGTTAGT                    | TCATGAAGTTCATGCAGGCAA                | <i>ErbB4</i>                                                                               |
| CGGCGAAAAGCAGAGTAAACC                     | CTCGTCGTCGATGGCATCTT                 | <i>Fog2</i>                                                                                |
| TCAACCGGCCCTCATTAAG                       | GTGGTGGTAGTCTGGCAGT                  | <i>Gata4</i>                                                                               |
| CATCACCATCACCCGACCTAC                     | GGCCCTGTAAGCTGTGGAG                  | <i>Gata6</i>                                                                               |
| GATGTCGCCCCTAAAACAGAC                     | CAGCCATAGAAAGTGTTTCAGGT              | <i>MMP2</i>                                                                                |
| GCACAAGACCAACCGCAAG                       | CGCTCGGCAATAGACAGGT                  | <i>Msx1</i>                                                                                |
| TTCCATTCTGGCTTGTCTAGT                     | TCCACAAATACCCACTTTAGGC               | <i>Neuregulin</i>                                                                          |
| GTGGCCCCCTACAAATCATTCTC                   | TGCTTTCCGTAAACTGTCCAG                | <i>NF1</i>                                                                                 |
| GGAGAGTCCGAGAACTCGAGAT                    | TTGCAGCTAGGAAGTACGTCT                | <i>NFatC1</i>                                                                              |
| GGTCTCAATGCCTATGGCTAC                     | GCCAAAGTTCACGAAGTTGCT                | <i>Nkx2-5</i>                                                                              |
| AGCCTCTCCACCAATACCTT                      | GGCTGGAGCTGTAAGTTCTG                 | <i>Notch1</i>                                                                              |
| AGAGGACGGGACTACACCTT                      | CCTTTTATCCCTGGCTCCTA                 | <i>Notch4</i>                                                                              |
| ATGACCTGTATGTTGGGAAAACG                   | GGTTCACACACTGATGGTTATC               | <i>Smurf1</i>                                                                              |
| CACACGCTGCCTTGTGTCT                       | GGTCAGCAAAGCAGCGTT                   | <i>Snail1</i>                                                                              |
| TGGTCAAGAAACATTTCAACGCC                   | GGTGAGGATCTCTGGTTTTGGTA              | <i>Snail2</i>                                                                              |
| ACATCGTGCAGCCAATGA                        | AGGTCTGTATGGGAGCTTCA                 | <i>TBX2</i>                                                                                |
| AAACCCCTGGAACAATTTGTGG                    | GTGGTGGGTATCAGTGGCTC                 | <i>TBX20</i>                                                                               |
| AGCTGGTGAAACGGAAGCG                       | GCGAGCCTTAGTTTGGACAGG                | <i>TGFb1</i>                                                                               |
| <b>ChIP</b>                               |                                      |                                                                                            |
| AAAGGTTGGACAGGCAGAAG                      | CTGTCAATGAACGGTCACCT                 | -650 Snail promoter                                                                        |
| AGCGAACTGGACACACACAC                      | CAAGGACAGTTTTGGCACAG                 | +157 Slug promoter                                                                         |
| <b>Antibodies</b>                         |                                      |                                                                                            |
| <b>Antibody</b>                           | <b>Clone</b>                         | <b>Dilution/application</b>                                                                |
| <b>Primary</b>                            |                                      |                                                                                            |
| CD31 (Pecam)                              | 390 (BD Biosciences)                 | 1:50/Immunofluorescence                                                                    |
| Snail1 + Snail2 (Snail + Slug)            | ab85931 (Abcam)                      | 1:500/Immunofluorescence                                                                   |
| CD144 (VE-cadherin)                       | 11D4.1 (BD Biosciences)              | 1:50/Immunofluorescence                                                                    |
| α-smooth muscle actin                     | 1A4 (Sigma Aldrich)                  | 1:200/Immunofluorescence                                                                   |
| ERG                                       | C-17; SC-354 (Santa Cruz)            | 1:200/ChIP                                                                                 |
| <b>Secondary</b>                          |                                      |                                                                                            |
| Alexa Fluor 488                           | Invitrogen                           | 1:400                                                                                      |
| Alexa Fluor 594                           | Invitrogen                           | 1:400                                                                                      |
